# Supplementary material for: Highly sensitive biosensor based on the synergistic effect of Fe3O4–Co3O4 bimetallic oxides and graphene
Source: Royal Society of Chemistry journal article supplement (doi:10.1039/c6ra18242a), 2016-01-01
Supplement: c6ra18242a1.pdf [file c6ra18242a1.pdf]

## Highly sensitive biosensor based on synergistic effect of Fe<sub>3</sub>O<sub>4</sub>-Co<sub>3</sub>O<sub>4</sub> bimetallic oxides and graphene

Shanying Han<sup>a</sup>, Tianyu Du<sup>a</sup>, Lanmei Lai<sup>a</sup>, Xuerui Jiang<sup>a</sup>, Chuansheng Cheng<sup>a</sup>, Hui Jiang<sup>a,\*</sup>, and Xuemei Wang<sup>a,\*</sup>

*State Key Lab of Bioelectronics (Chien-Shiung Wu Laboratory), Southeast University, No. 2 Sipailou, Nanjing 210096, China.*

\*Corresponding authors. Tel.: +86 25 83792177; Fax: +86 25 83792177.

E-mail addresses: sungi@seu.edu.cn (H. Jiang) or xuewang@seu.edu.cn (X. M. Wang).

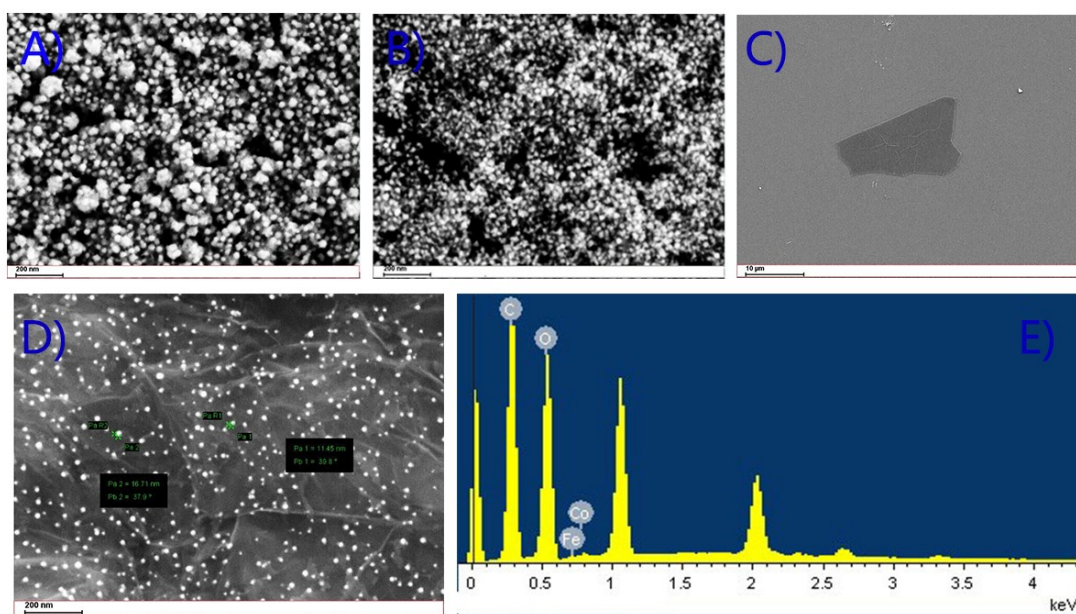

**Fig. S1.** SEM images of Co<sub>3</sub>O<sub>4</sub> (A), Fe<sub>3</sub>O<sub>4</sub>-Co<sub>3</sub>O<sub>4</sub> (B), rGO (C) and Fe<sub>3</sub>O<sub>4</sub>-Co<sub>3</sub>O<sub>4</sub>/rGO (D) modified on GCE. Picture E was the EDS of Fe<sub>3</sub>O<sub>4</sub>-Co<sub>3</sub>O<sub>4</sub>/rGO nanocomposites.

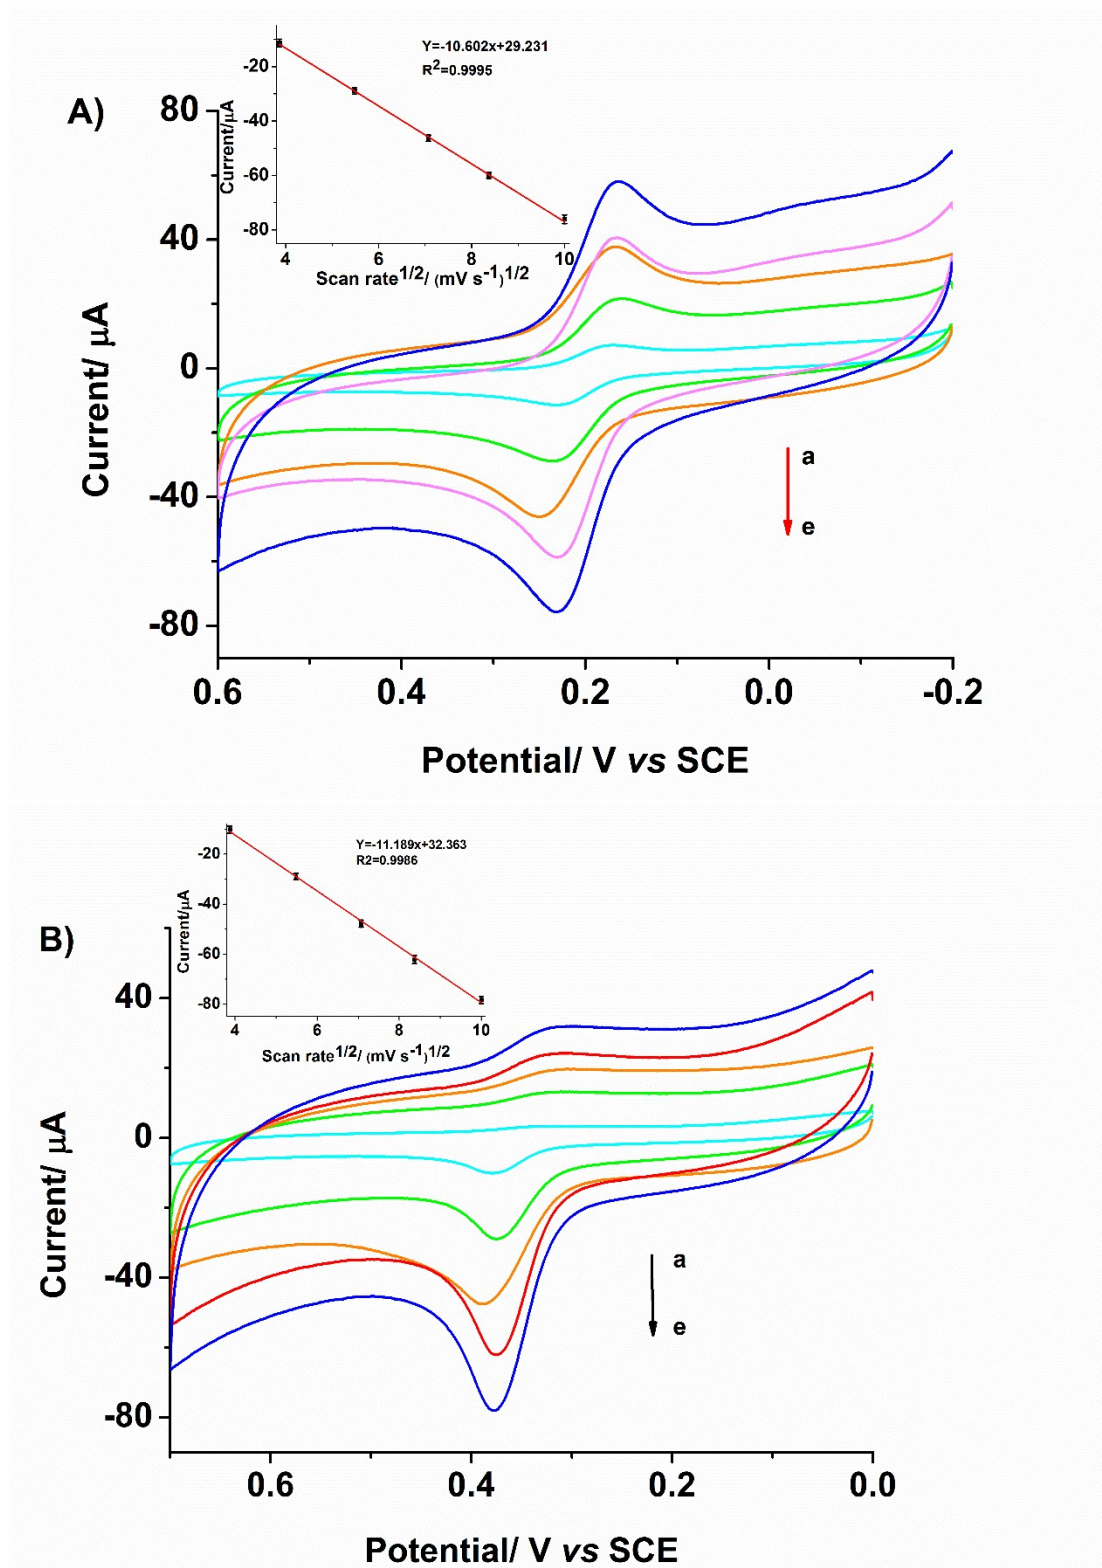

**Fig. S2.** CV studies of  $\text{Fe}_3\text{O}_4\text{-Co}_3\text{O}_4/\text{rGO}$  modified GCE in 0.5 mM DA (A) and 0.5 mM UA (B) at the scan rate of 15 (a), 30 (b), 50 (c), 70 (d) and 100 (e)  $\text{mV/s}$ . The linear relationship of peak currents vs the square root of scanning rates were presented in inset A and inset B.

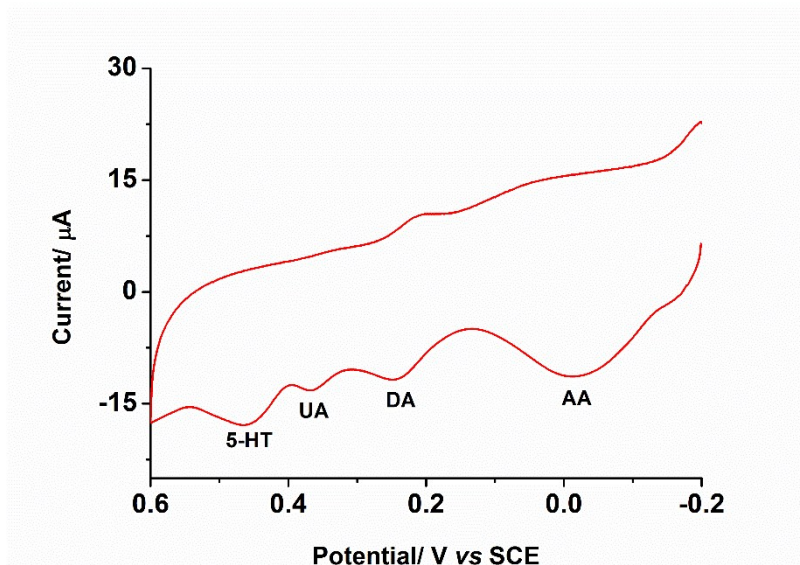

**Fig. S3.** CV curves of  $\text{Fe}_3\text{O}_4\text{-Co}_3\text{O}_4/\text{rGO}$  composites modified GCE in PBS (0.2 M, pH 7.4) containing 300  $\mu\text{M}$  AA, 80  $\mu\text{M}$  DA, 100  $\mu\text{M}$  UA and 300  $\mu\text{M}$  5-HT.

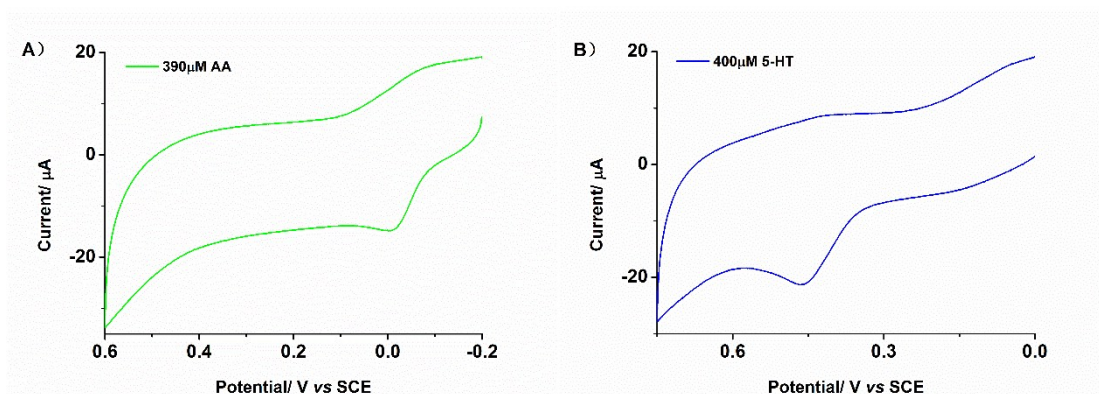

**Fig. S4.** Individual CVs for (A) AA and (B) 5-HT.

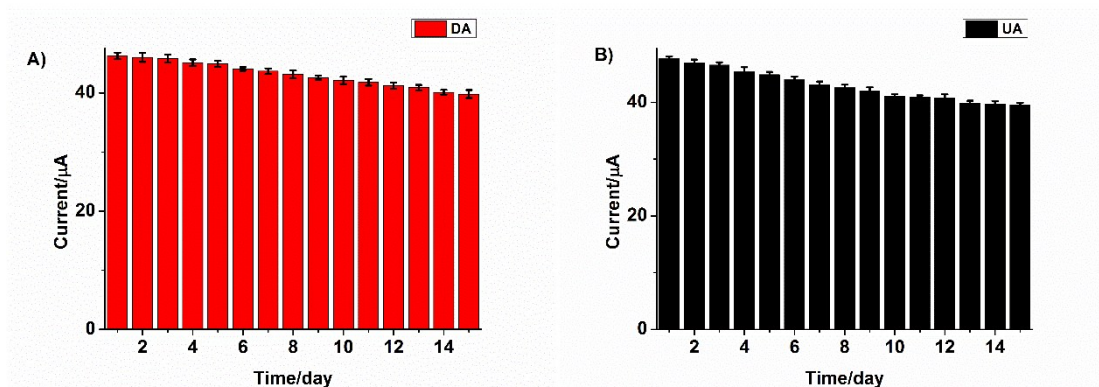

**Fig. S5.** The stability of the  $\text{Fe}_3\text{O}_4\text{-Co}_3\text{O}_4/\text{rGO}$  modified electrode in the detection of DA and UA.
